# Supplementary material for: Organisational factors that facilitate research use in public health policy-making: a scoping review
Source: PubMed Central journal article supplement (PMC6869261; doi:10.1186/s12961-019-0490-6), 2019-11-21
Supplement: 12961_2019_490_MOESM1_ESM.pdf [file 12961_2019_490_MOESM1_ESM.pdf]

## Additional file 1 Search profiles and results

### Search profile for PubMed 04.04.2017-05.04.2017

| Focus 1: Target population - policymakers | Hits   | Focus 2: Intervention - Research evidence use | Hits  | Focus 3: Policy area - HEPA policy    | Hits   | Focus 4: Theory                    | Hits    |
|-------------------------------------------|--------|-----------------------------------------------|-------|---------------------------------------|--------|------------------------------------|---------|
| organization* [tiab]                      | 315048 | "evidence based"[tiab]                        | 82325 | Health Services Research [MesH Terms] | 142642 | Models, Organizational[MesH Terms] | 17131   |
| organisation*[tiab]                       | 38571  | "evidence informed"[tiab]                     | 1212  | Public Policy[MesH Terms]             | 122596 | framework*[tiab]                   | 192807  |
| institution*[tiab]                        | 214699 | "research based"[tiab]                        | 3528  | Health Policy[MesH Terms]             | 92483  | theor*[tiab]                       | 518157  |
| administrat*[tiab]                        | 798070 | "research informed"[tiab]                     | 182   | health promotion polic*[tiab]         | 221    | approach*[tiab]                    | 1374170 |
| agen*[tiab]                               | 935354 | "evidence use"[tiab]                          | 61    | public health polic*[tiab]            | 4356   | model[tiab]                        | 1637253 |
| "public official"[tiab]                   | 27     | "use of evidence"[tiab]                       | 1668  | "health policy"[tiab]                 | 16918  | models[tiab]                       | 714377  |
| "public officials"[tiab]                  | 263    | "using evidence"[tiab]                        | 0     | "health policies"[tiab]               | 4633   | "best practice"[tiab]              | 9111    |
| "civil servant"[tiab]                     | 133    | "evidence translation"[tiab]                  | 36    | "planning policy"[tiab]               | 891    | determin*[tiab]                    | 2970496 |
| "civil servants"[tiab]                    | 996    | "translating evidence"[tiab]                  | 285   | "planning policies"[tiab]             | 195    | pathway*                           | 857241  |
| policy maker*[tiab]                       | 7416   | "translation of evidence"[tiab]               | 0     | "health service"[tiab]                | 37961  | concept*[tiab]                     | 388302  |
| "policy maker"[tiab]                      | 220    | "evidence utilization"[tiab]                  | 19    | "health services"[tiab]               | 64084  | Benchmarking[MesH Terms]           | 11429   |
| "policy makers"[tiab]                     | 15828  | "utilizing evidence"[tiab]                    | 54    | physical activity polic*[tiab]        | 131    | review[tiab]                       | 1218545 |

|                                             |         |                                   |     |                                  |      |                |         |
|---------------------------------------------|---------|-----------------------------------|-----|----------------------------------|------|----------------|---------|
| administrative personnel[MesH Terms]        | 38021   | "utilization of evidence"[tiab]   | 0   | sedentary lifestyle polic*[tiab] | 0    | overview[tiab] | 124573  |
| department*[tiab]                           | 252615  | "evidence utilisation"[tiab]      | 8   | physical exercise* polic*[tiab]  | 3912 | mechanism*     | 1767445 |
| government[MesH Terms]                      | 133707  | "utilising evidence"[tiab]        | 0   | sports polic*[tiab]              | 7    |                |         |
| government*[tiab]                           | 83079   | "utilisation of evidence"[tiab]   | 0   | sport polic*[tiab]               | 15   |                |         |
| "policy advisor"[tiab]                      | 5       | "evidence uptake"[tiab]           | 36  | healthy lifestyle polic*[tiab]   | 3    |                |         |
| "policy advisors"[tiab]                     | 40      | "uptake of evidence"[tiab]        | 0   | healthy public polic*[tiab]      | 208  |                |         |
| "policy analyst"[tiab]                      | 30      | "evidence impact"[tiab]           | 5   | "public policy"[tiab]            | 7950 |                |         |
| "policy analysts"[tiab]                     | 227     | "impact of evidence"[tiab]        | 0   | "public policies"[tiab]          | 2013 |                |         |
| Organization and Administration[MesH Terms] | 1212651 | "evidence dissemination"[tiab]    | 13  |                                  |      |                |         |
| Government Employees[MesH Terms]            | 12      | "disseminating evidence"[tiab]    | 113 |                                  |      |                |         |
| Public Health Administration[MesH Terms]    | 14755   | "dissemination of evidence"[tiab] | 0   |                                  |      |                |         |
| polycymaking[tiab]                          | 988     | "evidence diffusion"[tiab]        | 0   |                                  |      |                |         |
| "policy making"[tiab]                       | 3423    | "diffusion of evidence"[tiab]     | 0   |                                  |      |                |         |
| Policy Making [MesH Terms]                  | 21945   | "evidence exchange"[tiab]         | 0   |                                  |      |                |         |
| decision making[MesH Terms]                 | 164682  | "exchanging evidence"[tiab]       | 0   |                                  |      |                |         |
| "decision making"[tiab]                     | 95984   | "exchange of evidence"[tiab]      | 0   |                                  |      |                |         |
|                                             |         | "evidence transfer"[tiab]         | 8   |                                  |      |                |         |
|                                             |         | "transferring evidence"[tiab]     | 18  |                                  |      |                |         |
|                                             |         | "transfer of evidence"[tiab]      | 0   |                                  |      |                |         |

|  |                                   |      |  |  |  |
|--|-----------------------------------|------|--|--|--|
|  | "evidence capacity"[tiab]         | 0    |  |  |  |
|  | "research use"[tiab]              | 873  |  |  |  |
|  | "use of research"[tiab]           | 0    |  |  |  |
|  | "using research"[tiab]            | 0    |  |  |  |
|  | "research translation"[tiab]      | 166  |  |  |  |
|  | "translating research"[tiab]      | 645  |  |  |  |
|  | "translation of research"[tiab]   | 483  |  |  |  |
|  | "research utilization"[tiab]      | 608  |  |  |  |
|  | "utilizing research"[tiab]        | 47   |  |  |  |
|  | "utilization of research"[tiab]   | 127  |  |  |  |
|  | "research utilisation"[tiab]      | 71   |  |  |  |
|  | "utilising research"[tiab]        | 0    |  |  |  |
|  | "utilisation of research"[tiab]   | 0    |  |  |  |
|  | "research uptake"[tiab]           | 47   |  |  |  |
|  | "uptake of research"[tiab]        | 0    |  |  |  |
|  | "research impact"[tiab]           | 202  |  |  |  |
|  | "impact of research"[tiab]        | 0    |  |  |  |
|  | "research dissemination"[tiab]    | 148  |  |  |  |
|  | "disseminating research"[tiab]    | 122  |  |  |  |
|  | "dissemination of research"[tiab] | 271  |  |  |  |
|  | "research diffusion"[tiab]        | 0    |  |  |  |
|  | "diffusion of research"[tiab]     | 0    |  |  |  |
|  | "research transfer"[tiab]         | 35   |  |  |  |
|  | "transferring research"[tiab]     | 35   |  |  |  |
|  | "transfer of research"[tiab]      | 0    |  |  |  |
|  | "research capacity"[tiab]         | 1004 |  |  |  |
|  | "research literacy"[tiab]         | 62   |  |  |  |
|  | "knowledge use"[tiab]             | 88   |  |  |  |
|  | "use of knowledge"[tiab]          | 0    |  |  |  |

|  |                                      |      |  |  |  |  |
|--|--------------------------------------|------|--|--|--|--|
|  | "using knowledge"[tiab]              | 0    |  |  |  |  |
|  | "knowledge translation"[tiab]        | 1888 |  |  |  |  |
|  | "translating knowledge"[tiab]        | 166  |  |  |  |  |
|  | "translation of knowledge"[tiab]     | 0    |  |  |  |  |
|  | "knowledge utilization"[tiab]        | 66   |  |  |  |  |
|  | "utilizing knowledge"[tiab]          | 32   |  |  |  |  |
|  | "utilization of knowledge"[tiab]     | 0    |  |  |  |  |
|  | "knowledge utilisation"[tiab]        | 9    |  |  |  |  |
|  | "utilising knowledge"[tiab]          | 6    |  |  |  |  |
|  | "utilisation of knowledge"[tiab]     | 0    |  |  |  |  |
|  | "knowledge dissemination"[tiab]      | 169  |  |  |  |  |
|  | "disseminating knowledge"[tiab]      | 92   |  |  |  |  |
|  | "dissemination of knowledge"[tiab]   | 0    |  |  |  |  |
|  | "knowledge diffusion"[tiab]          | 35   |  |  |  |  |
|  | "diffusing knowledge"[tiab]          | 0    |  |  |  |  |
|  | "diffusion of knowledge"[tiab]       | 64   |  |  |  |  |
|  | "knowledge exchange"[tiab]           | 396  |  |  |  |  |
|  | "exchanging knowledge"[tiab]         | 24   |  |  |  |  |
|  | "exchange of knowledge"[tiab]        | 181  |  |  |  |  |
|  | "knowledge sharing"[tiab]            | 506  |  |  |  |  |
|  | "sharing of knowledge"[tiab]         | 0    |  |  |  |  |
|  | "scientific information use"[tiab]   | 0    |  |  |  |  |
|  | "using scientific information"[tiab] | 0    |  |  |  |  |



evidence"[Title/Abstract]) OR "dissemination of evidence"[Title/Abstract]) OR "evidence diffusion"[Title/Abstract]) OR "diffusion of evidence"[Title/Abstract]) OR "evidence exchange"[Title/Abstract]) OR "exchanging evidence"[Title/Abstract]) OR "exchange of evidence"[Title/Abstract]) OR "evidence transfer"[Title/Abstract]) OR "transferring evidence"[Title/Abstract]) OR "transfer of evidence"[Title/Abstract]) OR "evidence capacity"[Title/Abstract]) OR "research use"[Title/Abstract]) OR "use of research"[Title/Abstract]) OR "using research"[Title/Abstract]) OR "research translation"[Title/Abstract]) OR "translating research"[Title/Abstract]) OR "translation of research"[Title/Abstract]) OR "research utilization"[Title/Abstract]) OR "utilizing research"[Title/Abstract]) OR "utilization of research"[Title/Abstract]) OR "research utilisation"[Title/Abstract]) OR "utilising research"[Title/Abstract]) OR "utilisation of research"[Title/Abstract]) OR "research uptake"[Title/Abstract]) OR "uptake of research"[Title/Abstract]) OR "research impact"[Title/Abstract]) OR "impact of research"[Title/Abstract]) OR "research dissemination"[Title/Abstract]) OR "disseminating research"[Title/Abstract]) OR "dissemination of research"[Title/Abstract]) OR "research diffusion"[Title/Abstract]) OR "diffusion of research"[Title/Abstract]) OR "research transfer"[Title/Abstract]) OR "transferring research"[Title/Abstract]) OR "transfer of research"[Title/Abstract]) OR "research capacity"[Title/Abstract]) OR "research literacy"[Title/Abstract]) OR "knowledge use"[Title/Abstract]) OR "use of knowledge"[Title/Abstract]) OR "using knowledge"[Title/Abstract]) OR "knowledge translation"[Title/Abstract]) OR "translating knowledge"[Title/Abstract]) OR "translation of knowledge"[Title/Abstract]) OR "knowledge utilization"[Title/Abstract]) OR "utilizing knowledge"[Title/Abstract]) OR "utilization of knowledge"[Title/Abstract]) OR "knowledge utilisation"[Title/Abstract]) OR "utilising knowledge"[Title/Abstract]) OR "utilisation of knowledge"[Title/Abstract]) OR "knowledge dissemination"[Title/Abstract]) OR "disseminating knowledge"[Title/Abstract]) OR "dissemination of knowledge"[Title/Abstract]) OR "knowledge diffusion"[Title/Abstract]) OR "diffusing knowledge"[Title/Abstract]) OR "diffusion of knowledge"[Title/Abstract]) OR "knowledge exchange"[Title/Abstract]) OR "exchanging knowledge"[Title/Abstract]) OR "exchange of knowledge"[Title/Abstract]) OR "knowledge sharing"[Title/Abstract]) OR "sharing of knowledge"[Title/Abstract]) OR "scientific information use"[Title/Abstract]) OR "using scientific information"[Title/Abstract]) OR "use of scientific information"[Title/Abstract]) OR "information literacy"[Title/Abstract]) OR "science literacy"[Title/Abstract]) OR "scientific literacy"[Title/Abstract]) OR "scientific capacity"[Title/Abstract]) OR "science capacity"[Title/Abstract]) AND (((((((((((((((public policy[MeSH Terms]) OR health policy[MeSH Terms]) OR health promotion polic\*[Title/Abstract]) OR public health polic\*[Title/Abstract]) OR "health policy"[Title/Abstract]) OR "health policies"[Title/Abstract]) OR "planning policy"[Title/Abstract]) OR "planning policies"[Title/Abstract]) OR "health service"[Title/Abstract]) OR "health services"[Title/Abstract]) OR physical activity polic\*[Title/Abstract]) OR sports polic\*[Title/Abstract]) OR sport polic\*[Title/Abstract]) OR healthy lifestyle polic\*[Title/Abstract]) OR healthy public polic\*[Title/Abstract]) OR "public policy"[Title/Abstract]) OR "public policies"[Title/Abstract]))) AND (((((((((((((((models, organizational[MeSH Terms]) OR framework\*[Title/Abstract]) OR theor\*[Title/Abstract]) OR approach\*[Title/Abstract]) OR model[Title/Abstract]) OR models[Title/Abstract]) OR "best practice"[Title/Abstract]) OR determin\*[Title/Abstract]) OR pathway\*[Title/Abstract]) OR concept\*[Title/Abstract]) OR benchmarking[MeSH Terms]) OR review[Title/Abstract]) OR overview[Title/Abstract]) OR mechanism\*[Title/Abstract]))

Search profile for Academic Search Premier 28.06.2017-04.07.2017

| Advanced search filters: Published date 01.01.1970 – 04.07.2017, abstract or author supplied abstract |        |                                               |       |                                    |       |                 |         |
|-------------------------------------------------------------------------------------------------------|--------|-----------------------------------------------|-------|------------------------------------|-------|-----------------|---------|
| Focus 1: Target population - policymakers                                                             | Hits   | Focus 2: Intervention - Research evidence use | Hits  | Focus 3: Policy area - HEPA policy | Hits  | Focus 4: Theory | Hits    |
| organization*                                                                                         | 529014 | "evidence based"                              | 45901 | health promotion polic*            | 593   |                 |         |
| institution*                                                                                          | 284969 | "evidence informed"                           | 829   | public health polic*               | 7057  | framework*      | 361278  |
| administrat*                                                                                          | 526173 | "research based"                              | 5636  | "health policy"                    | 10670 | theor*          | 1119784 |
| department*                                                                                           | 340713 | "research informed"                           | 313   | "health policies"                  | 3223  | approach*       | 1368031 |
| government*                                                                                           | 586334 | "evidence use"                                | 96    | "planning policy"                  | 679   | model OR models | 2275950 |
| agen*                                                                                                 | 694703 | "use of evidence"                             | 1966  | "planning policies"                | 508   | "best practice" | 8738    |
| official OR officials                                                                                 | 181337 | "using evidence"                              | 1135  | "public policy"                    | 20076 | determin*       | 1994823 |
| servant OR servants                                                                                   | 8086   | "evidence translation"                        | 21    | "public policies"                  | 4535  | pathway*        | 436254  |
| policy maker*                                                                                         | 13750  | "translating evidence"                        | 85    | physical activity polic*           | 454   | concept*        | 582480  |
| "policy maker"                                                                                        | 470    | "translation of evidence"                     | 154   | sedentary lifestyle polic*         | 2     | benchmark*      | 55822   |
| "policy makers"                                                                                       | 27864  | "evidence utilization"                        | 13    | physical exercis* polic*           | 15    | review          | 3383710 |
| "policy analyst"                                                                                      | 520    | "utilizing evidence"                          | 40    | sport* polic*                      | 726   | overview        | 195586  |
| "policy analysts"                                                                                     | 549    | "utilization of evidence"                     | 91    | healthy lifestyle polic*           | 58    | mechanism*      | 1100112 |
| "decision maker"                                                                                      | 3110   | "evidence utilisation"                        | 5     | healthy public polic*              | 157   | factors         | 1723030 |
| "decision makers"                                                                                     | 14730  | "utilising evidence"                          | 9     |                                    |       |                 |         |
| "decision making"                                                                                     | 100270 | "utilisation of evidence"                     | 9     |                                    |       |                 |         |
| "policy making"                                                                                       | 10935  | "evidence uptake"                             | 18    |                                    |       |                 |         |
| polycymaking                                                                                          | 4437   | "uptake of evidence"                          | 163   |                                    |       |                 |         |
|                                                                                                       |        | "evidence impact"                             | 20    |                                    |       |                 |         |

|  |                             |      |  |  |  |  |
|--|-----------------------------|------|--|--|--|--|
|  | "impact of evidence"        | 156  |  |  |  |  |
|  | "evidence dissemination"    | 13   |  |  |  |  |
|  | "disseminating evidence"    | 58   |  |  |  |  |
|  | "dissemination of evidence" | 200  |  |  |  |  |
|  | "evidence diffusion"        | 2    |  |  |  |  |
|  | "diffusion of evidence"     | 29   |  |  |  |  |
|  | "evidence exchange"         | 2    |  |  |  |  |
|  | "exchanging evidence"       | 0    |  |  |  |  |
|  | "exchange of evidence"      | 41   |  |  |  |  |
|  | "evidence transfer"         | 6    |  |  |  |  |
|  | "transferring evidence"     | 7    |  |  |  |  |
|  | "transfer of evidence"      | 79   |  |  |  |  |
|  | "evidence capacity"         | 2    |  |  |  |  |
|  | "research use"              | 902  |  |  |  |  |
|  | "use of research"           | 2603 |  |  |  |  |
|  | "using research"            | 593  |  |  |  |  |
|  | "research translation"      | 109  |  |  |  |  |
|  | "translating research"      | 323  |  |  |  |  |
|  | "translation of research"   | 391  |  |  |  |  |
|  | "research utilization"      | 262  |  |  |  |  |
|  | "utilizing research"        | 39   |  |  |  |  |
|  | "utilization of research"   | 152  |  |  |  |  |
|  | "research utilisation"      | 41   |  |  |  |  |
|  | "utilising research"        | 8    |  |  |  |  |
|  | "utilisation of research"   | 23   |  |  |  |  |
|  | "research uptake"           | 40   |  |  |  |  |
|  | "uptake of research"        | 97   |  |  |  |  |
|  | "research impact"           | 530  |  |  |  |  |
|  | "impact of research"        | 975  |  |  |  |  |
|  | "research dissemination"    | 149  |  |  |  |  |



|  |                                 |      |  |  |  |  |
|--|---------------------------------|------|--|--|--|--|
|  | "disseminating research"        | 120  |  |  |  |  |
|  | "dissemination of research"     | 328  |  |  |  |  |
|  | "research diffusion"            | 15   |  |  |  |  |
|  | "diffusion of research"         | 47   |  |  |  |  |
|  | "research transfer"             | 37   |  |  |  |  |
|  | "transferring research"         | 23   |  |  |  |  |
|  | "transfer of research"          | 221  |  |  |  |  |
|  | "research capacity"             | 846  |  |  |  |  |
|  | "research literacy"             | 56   |  |  |  |  |
|  | "knowledge use"                 | 235  |  |  |  |  |
|  | "use of knowledge"              | 1913 |  |  |  |  |
|  | "using knowledge"               | 517  |  |  |  |  |
|  | "knowledge translation"         | 932  |  |  |  |  |
|  | "translating knowledge"         | 79   |  |  |  |  |
|  | "translation of knowledge"      | 113  |  |  |  |  |
|  | "knowledge utilization"         | 117  |  |  |  |  |
|  | "utilizing knowledge"           | 38   |  |  |  |  |
|  | "utilization of knowledge"      | 67   |  |  |  |  |
|  | "knowledge utilisation"         | 23   |  |  |  |  |
|  | "utilising knowledge"           | 10   |  |  |  |  |
|  | "utilisation of knowledge"      | 13   |  |  |  |  |
|  | "knowledge dissemination"       | 220  |  |  |  |  |
|  | "disseminating knowledge"       | 113  |  |  |  |  |
|  | "dissemination of<br>knowledge" | 380  |  |  |  |  |
|  | "knowledge diffusion"           | 123  |  |  |  |  |
|  | "diffusing knowledge"           | 10   |  |  |  |  |
|  | "diffusion of knowledge"        | 135  |  |  |  |  |
|  | "knowledge exchange"            | 714  |  |  |  |  |
|  | "exchanging knowledge"          | 37   |  |  |  |  |

|                           |         |                                 |       |  |         |  |          |
|---------------------------|---------|---------------------------------|-------|--|---------|--|----------|
|                           |         | "exchange of knowledge"         | 395   |  |         |  |          |
|                           |         | "knowledge sharing"             | 1714  |  |         |  |          |
|                           |         | "sharing of knowledge"          | 546   |  |         |  |          |
|                           |         | "scientific information use"    | 5     |  |         |  |          |
|                           |         | "using scientific information"  | 2     |  |         |  |          |
|                           |         | "use of scientific information" | 21    |  |         |  |          |
|                           |         | "information literacy"          | 3455  |  |         |  |          |
|                           |         | "science literacy"              | 495   |  |         |  |          |
|                           |         | "scientific literacy"           | 772   |  |         |  |          |
|                           |         | "scientific capacity"           | 60    |  |         |  |          |
|                           |         | "science capacity"              | 18    |  |         |  |          |
| Block search              | 2834840 |                                 | 73885 |  | 2300011 |  | 10817594 |
|                           |         |                                 |       |  |         |  |          |
| Focus 1 AND 2             | 21379   |                                 |       |  |         |  |          |
| Focus 1 AND 2 AND 3       | 837     |                                 |       |  |         |  |          |
| Focus 1 AND 2 AND 3 AND 4 | 638     |                                 |       |  |         |  |          |

**Full search strategy for Academic Search Premier:**

Block 1 search query

organi?ation\* OR institution\* OR administrat\* OR department\* OR government\* OR agen\* OR (official OR officials) OR (servant OR serva  
OR policymaker\* OR ("policy maker" OR "policy makers") OR ("policy analyst" OR "policy analysts") OR ("decision maker" OR "decision  
makers") OR "decision making" OR "policy making" OR policymaking

Block 2 search query

"evidence based" OR "evidence informed" OR "research based" OR "research informed" OR "evidence use" OR "use of evidence" OR "using evidence" OR "evidence translation" OR "translating evidence" OR "translation of evidence" OR "evidence utilization" OR "utilizing evidence" OR "utilization of evidence" OR "evidence uptake" OR "uptake of evidence" OR "evidence impact" OR "impact of evidence" OR "evidence dissemination" OR "disseminating evidence" OR "dissemination of evidence" OR "evidence diffusion" OR "diffusion of evidence" OR "evidence exchange" OR "exchanging evidence" OR "exchange of evidence" OR "evidence transfer" OR "transferring evidence" OR "transfer of evidence" OR "evidence capacity" OR "research use" OR "use of research" OR "using research" OR "research translation" OR "translating research" OR "translation of research" OR "research utilization" OR "utilizing research" OR "utilization of research" OR "research uptake" OR "uptake of research" OR "research impact" OR "impact of research" OR "research dissemination" OR "disseminating research" OR "dissemination of research" OR "research diffusion" OR "diffusion of research" OR "research transfer" OR "transferring research" OR "transfer of research" OR "research capacity" OR "research literacy" OR "knowledge use" OR "use of knowledge" OR "using knowledge" OR "knowledge translation" OR "translating knowledge" OR "translation of knowledge" OR "knowledge utilization" OR "utilizing knowledge" OR "utilization of knowledge" OR "knowledge dissemination" OR "disseminating knowledge" OR "dissemination of knowledge" OR "knowledge diffusion" OR "diffusing knowledge" OR "diffusion of knowledge" OR "knowledge exchange" OR "exchanging knowledge" OR "exchange of knowledge" OR "knowledge sharing" OR "sharing of knowledge" OR "scientific information use" OR "using scientific information" OR "use of scientific information" OR "information literacy" OR "science literacy" OR "scientific literacy" OR "scientific capacity" OR "science capacity"

Block 3 search query

(health promotion polic\*) OR (public health polic\*) OR ("health policy" OR "health policies") OR ("planning policy" OR "planning policies") OR ("public policy" OR "public policies") OR (physical activity polic\*) OR (sedentary lifestyle polic\*) OR (physical exercis\* polic\*) OR (sport\* polic\*) OR (healthy lifestyle polic\*) OR (healthy public polic\*)

Block 4 search query

framework\* OR theor\* OR approach\* OR (model OR models) OR "best practice" OR determin\* OR pathway\* OR concept\* OR benchmark\* OR review OR overview OR mechanism\*

Search profile for Scopus 04.07.2017-07.07.2017

| Advanced search filters: Published date 01.01.1970 - 07.07.2017, abstract |         |                                               |       |                                            |       |                   |         |
|---------------------------------------------------------------------------|---------|-----------------------------------------------|-------|--------------------------------------------|-------|-------------------|---------|
| Focus 1: Target population - policymakers                                 | Hits    | Focus 2: Intervention - Research evidence use | Hits  | Focus 3: Policy area - HEPA policy         | Hits  | Focus 4: Theory   | Hits    |
| organization*                                                             | 2407299 | "evidence based"                              | 91899 | (health promotion polic*)                  | 6765  | framework*        | 1135454 |
| institution*                                                              | 583008  | "evidence informed"                           | 1355  | (public health polic*)                     | 47595 | theor*            | 3391961 |
| administrat*                                                              | 1010874 | "research based"                              | 13442 | ("health policy" OR "health policies")     | 21943 | approach*         | 4401305 |
| department*                                                               | 465837  | "research informed"                           | 564   | ("planning policy" OR "planning policies") | 2988  | (model OR models) | 7545653 |
| government*                                                               | 462464  | "evidence use"                                | 167   | ("public policy" OR "public policies")     | 35360 | "best practice"   | 57658   |
| agen*                                                                     | 1600652 | "use of evidence"                             | 2166  | (physical activity polic*)                 | 6563  | determin*         | 6516201 |
| (official OR officials)                                                   | 106565  | "using evidence"                              | 2436  | (sedentary lifestyle polic*)               | 235   | pathway*          | 1024574 |
| (servant OR servants)                                                     | 8023    | "evidence translation"                        | 37    | (physical exercis* polic*)                 | 1009  | concept*          | 1655020 |
| policy maker*                                                             | 25008   | "translating evidence"                        | 183   | (sport* polic*)                            | 4150  | benchmark*        | 189965  |
| ("policy maker" OR "policy makers")                                       | 57945   | "translation of evidence"                     | 230   | (healthy lifestyle polic*)                 | 946   | review            | 1956281 |
| ("policy analyst" OR "policy analysts")                                   | 1250    | "evidence utilization"                        | 30    | (healthy public polic*)                    | 3204  | overview          | 350770  |
| ("decision maker" OR "decision makers")                                   | 62165   | "utilizing evidence"                          | 101   |                                            |       | mechanism*        | 3345915 |
| "decision making"                                                         | 281440  | "utilization of evidence"                     | 122   |                                            |       | factors           | 4734845 |
| "policy making"                                                           | 19079   | "evidence uptake"                             | 37    |                                            |       |                   |         |
| polycymaking                                                              | 5857    | "uptake of evidence"                          | 198   |                                            |       |                   |         |

|  |                             |      |  |  |  |
|--|-----------------------------|------|--|--|--|
|  | "evidence impact"           | 37   |  |  |  |
|  | "impact of evidence"        | 111  |  |  |  |
|  | "evidence dissemination"    | 16   |  |  |  |
|  | "disseminating evidence"    | 121  |  |  |  |
|  | "dissemination of evidence" | 313  |  |  |  |
|  | "evidence diffusion"        | 5    |  |  |  |
|  | "diffusion of evidence"     | 39   |  |  |  |
|  | "evidence exchange"         | 9    |  |  |  |
|  | "exchanging evidence"       | 2    |  |  |  |
|  | "exchange of evidence"      | 9    |  |  |  |
|  | "evidence transfer"         | 13   |  |  |  |
|  | "transferring evidence"     | 16   |  |  |  |
|  | "transfer of evidence"      | 39   |  |  |  |
|  | "evidence capacity"         | 5    |  |  |  |
|  | "research use"              | 5391 |  |  |  |
|  | "use of research"           | 1228 |  |  |  |
|  | "using research"            | 1228 |  |  |  |
|  | "research translation"      | 195  |  |  |  |
|  | "translating research"      | 508  |  |  |  |
|  | "translation of research"   | 596  |  |  |  |
|  | "research utilization"      | 690  |  |  |  |
|  | "utilizing research"        | 102  |  |  |  |
|  | "utilization of research"   | 211  |  |  |  |
|  | "research uptake"           | 64   |  |  |  |
|  | "uptake of research"        | 132  |  |  |  |
|  | "research impact"           | 652  |  |  |  |
|  | "impact of research"        | 714  |  |  |  |
|  | "research dissemination"    | 260  |  |  |  |
|  | "disseminating research"    | 211  |  |  |  |
|  | "dissemination of research" | 570  |  |  |  |

|  |                                 |      |  |  |  |
|--|---------------------------------|------|--|--|--|
|  | "research diffusion"            | 37   |  |  |  |
|  | "diffusion of research"         | 51   |  |  |  |
|  | "research transfer"             | 87   |  |  |  |
|  | "transferring research"         | 72   |  |  |  |
|  | "transfer of research"          | 215  |  |  |  |
|  | "research capacity"             | 1560 |  |  |  |
|  | "research literacy"             | 76   |  |  |  |
|  | "knowledge use"                 | 590  |  |  |  |
|  | "use of knowledge"              | 2004 |  |  |  |
|  | "using knowledge"               | 2534 |  |  |  |
|  | "knowledge translation"         | 1743 |  |  |  |
|  | "translating knowledge"         | 145  |  |  |  |
|  | "translation of knowledge"      | 217  |  |  |  |
|  | "knowledge utilization"         | 448  |  |  |  |
|  | "utilizing knowledge"           | 260  |  |  |  |
|  | "utilization of knowledge"      | 260  |  |  |  |
|  | "knowledge dissemination"       | 696  |  |  |  |
|  | "disseminating knowledge"       | 287  |  |  |  |
|  | "dissemination of knowledge"    | 951  |  |  |  |
|  | "knowledge diffusion"           | 622  |  |  |  |
|  | "diffusing knowledge"           | 43   |  |  |  |
|  | "diffusion of knowledge"        | 400  |  |  |  |
|  | "knowledge exchange"            | 2365 |  |  |  |
|  | "exchanging knowledge"          | 177  |  |  |  |
|  | "exchange of knowledge"         | 886  |  |  |  |
|  | "knowledge sharing"             | 9652 |  |  |  |
|  | "sharing of knowledge"          | 1093 |  |  |  |
|  | "scientific information use"    | 4    |  |  |  |
|  | "using scientific information"  | 12   |  |  |  |
|  | "use of scientific information" | 58   |  |  |  |

|                           |         |                        |        |  |        |          |
|---------------------------|---------|------------------------|--------|--|--------|----------|
|                           |         | "information literacy" | 4233   |  |        |          |
|                           |         | "science literacy"     | 453    |  |        |          |
|                           |         | "scientific literacy"  | 1025   |  |        |          |
|                           |         | "scientific capacity"  | 172    |  |        |          |
|                           |         | "science capacity"     | 29     |  |        |          |
|                           |         |                        |        |  |        |          |
|                           |         |                        |        |  |        |          |
|                           |         |                        |        |  |        |          |
|                           |         |                        |        |  |        |          |
|                           |         |                        |        |  |        |          |
|                           |         |                        |        |  |        |          |
|                           |         |                        |        |  |        |          |
|                           |         |                        |        |  |        |          |
| Block search              | 6174145 |                        | 150196 |  | 102459 | 24582325 |
|                           |         |                        |        |  |        |          |
| Focus 1 AND 2             | 52671   |                        |        |  |        |          |
| Focus 1 AND 2 AND 3       | 2930    |                        |        |  |        |          |
| Focus 1 AND 2 AND 3 AND 4 | 2300    |                        |        |  |        |          |

**Full search strategy for Scopus:** N/A
