# Supplementary material for: Organisational factors that facilitate research use in public health policy-making: a scoping review
Source: Springer Nature journal article supplement (doi:10.1186/s12961-019-0490-6), 2019-11-21
Supplement: MOESM3 [file 17415866]

### Additional file 3 Overview of organisational factor and targeted policy level and population in each included study

| Study reference (alphabetical order) | Organisational factors as listed in Table 2 in the article | External knowledge exchange | Gender and age | Individual values, interests | Position, status, and role in | Research awareness, research | Performance management | Strategic commitment to | Access to research | Inter-organisational | Intra-organisational | Knowledge management | Political environment | Implicit rules and preferences | Function of the organisation | Size and complexity of the | Policy area | Level of government or | Location | International | National/federal | State/regional | Local | Civil servants | Politicians | Service managers and | Researchers | Other external actors |
|--------------------------------------|------------------------------------------------------------|-----------------------------|----------------|------------------------------|-------------------------------|------------------------------|------------------------|-------------------------|--------------------|----------------------|----------------------|----------------------|-----------------------|--------------------------------|------------------------------|----------------------------|-------------|------------------------|----------|---------------|------------------|----------------|-------|----------------|-------------|----------------------|-------------|-----------------------|
|                                      |                                                            |                             |                |                              |                               |                              |                        |                         |                    |                      |                      |                      |                       |                                |                              |                            |             |                        |          |               |                  |                |       |                |             |                      |             |                       |
| Albert, Fretheim and Maiga (2007)    | 8,9,20,22,25,29                                            |                             |                | ✓                            |                               | ✓                            | ✓                      | ✓                       |                    |                      |                      |                      |                       |                                |                              |                            |             |                        |          |               | ✓                |                |       | ✓              |             |                      |             | ✓                     |
| Armstrong et al. (2013)              | 22,25,29,30,31,32                                          |                             |                |                              |                               | ✓                            | ✓                      | ✓                       | ✓                  |                      |                      |                      |                       |                                |                              |                            |             |                        |          |               |                  |                | ✓     | ✓              |             |                      |             |                       |
| Atkins et al. (2017)                 | 9,15,21                                                    |                             |                | ✓                            | ✓                             | ✓                            |                        |                         |                    |                      |                      |                      |                       |                                |                              |                            |             |                        |          |               |                  |                | ✓     | ✓              |             |                      |             |                       |
| Belkhdouja et al. (2007)             | 2,9,20,25,26,28,29,51,55                                   |                             |                | ✓                            |                               | ✓                            | ✓                      | ✓                       |                    |                      |                      |                      |                       |                                | ✓                            | ✓                          |             |                        |          |               |                  | ✓              | ✓     | ✓              |             |                      |             |                       |
| Brennan et al. (2016)                | 15,16,17,21,25,28,32,33,38,39,45,50                        |                             |                |                              | ✓                             | ✓                            | ✓                      | ✓                       | ✓                  |                      | ✓                    |                      | ✓                     | ✓                              |                              |                            |             |                        |          |               | ✓                |                |       | ✓              |             |                      |             |                       |
| Cherney et al. (2015)                | 8,9,18,22,29,31,39                                         |                             |                | ✓                            |                               | ✓                            | ✓                      | ✓                       | ✓                  |                      | ✓                    |                      |                       |                                |                              |                            |             |                        |          |               |                  | ✓              |       | ✓              |             |                      |             |                       |
| Contandriopoulos et al. (2010)       | 8,9,13,15,28,29,31,34,36,47                                |                             |                | ✓                            | ✓                             |                              |                        | ✓                       | ✓                  | ✓                    |                      |                      | ✓                     | ✓                              |                              |                            |             |                        |          | ✓             | ✓                | ✓              | ✓     | ✓              | ✓           |                      | ✓           | ✓                     |
| Dobbins et al. (2001)                | 6,9,17,22,25,31,50                                         |                             | ✓              | ✓                            |                               | ✓                            | ✓                      |                         | ✓                  |                      |                      |                      |                       | ✓                              |                              |                            |             |                        |          |               |                  | ✓              | ✓     | ✓              |             |                      |             |                       |

- Individual factors
- Management of research integration
- Organisational systems and infrastructure for research use
- Institutional structures and rules for policymaking
- Organisational characteristics
- Policy level
- Population

| Study reference (alphabetical order) | Organisational factors as listed in Table 2 in the article | External knowledge exchange | Gender and age | Individual values, interests | Position, status, and role in | Research awareness, research | Performance management | Strategic commitment to | Access to research | Inter-organisational | Intra-organisational | Knowledge management | Political environment | Implicit rules and preferences | Function of the organisation | Size and complexity of the | Policy area | Level of government or | Location | International | National/federal | State/regional | Local | Civil servants | Politicians | Service managers and | Researchers | Other external actors |
|--------------------------------------|------------------------------------------------------------|-----------------------------|----------------|------------------------------|-------------------------------|------------------------------|------------------------|-------------------------|--------------------|----------------------|----------------------|----------------------|-----------------------|--------------------------------|------------------------------|----------------------------|-------------|------------------------|----------|---------------|------------------|----------------|-------|----------------|-------------|----------------------|-------------|-----------------------|
|                                      |                                                            |                             |                |                              |                               |                              |                        |                         |                    |                      |                      |                      |                       |                                |                              |                            |             |                        |          |               |                  |                |       |                |             |                      |             |                       |
| Dobbins et al. (2002)                | 3,6,9,14,15,18,23,32,36,39,46,50,54,55,56,64               | √                           | √              | √                            | √                             | √                            | √                      |                         | √                  | √                    | √                    |                      | √                     | √                              | √                            | √                          |             |                        | √        |               |                  |                | √     | √              |             |                      |             |                       |
| El-Jardali et al. (2012)             | 9,21,25                                                    |                             |                | √                            |                               | √                            | √                      |                         |                    |                      |                      |                      |                       |                                |                              |                            |             |                        |          |               | √                |                |       |                |             |                      |             | √                     |
| Elliott and Popay (2000)             | 16,22,37,39,48                                             |                             |                |                              |                               | √                            | √                      |                         |                    | √                    | √                    |                      |                       | √                              |                              |                            |             |                        |          |               |                  | √              | √     | √              |             |                      |             |                       |
| Fazli et al. (2017)                  | 36                                                         |                             |                |                              |                               |                              |                        |                         | √                  | √                    |                      |                      |                       |                                |                              |                            |             |                        |          |               | √                | √              | √     | √              |             |                      |             | √                     |
| Greenhalgh et al. (2004)             | 9,12,13,17,21,25,27,28,29,30,32,38,39,40,42,45,48,49       |                             |                | √                            | √                             | √                            | √                      | √                       | √                  |                      | √                    | √                    | √                     | √                              |                              |                            |             |                        |          |               | √                | √              | √     | √              |             | √                    |             |                       |
| Hardy et al. (2015)                  | 21,25,30                                                   |                             |                |                              |                               | √                            | √                      | √                       |                    |                      |                      |                      |                       |                                |                              |                            |             |                        |          |               |                  |                | √     | √              |             |                      |             |                       |
| Hawkes et al. (2016)                 | 21,35,36                                                   |                             |                |                              |                               | √                            |                        |                         | √                  | √                    |                      |                      |                       |                                |                              |                            |             |                        |          |               | √                |                | √     | √              | √           |                      | √           | √                     |
| Huckel Schneider et al. (2014)       | 2,16, 20,21,25,26,43,45,47                                 |                             |                |                              |                               | √                            | √                      |                         |                    |                      |                      | √                    | √                     |                                |                              |                            |             |                        |          |               |                  | √              |       | √              |             |                      |             |                       |
| Hutchinson et al. (2011)             | 12,13                                                      |                             |                |                              | √                             |                              |                        |                         |                    |                      |                      |                      |                       |                                |                              |                            |             |                        |          |               | √                |                |       | √              |             | √                    | √           |                       |

- Individual factors
- Management of research integration
- Organisational systems and infrastructure for research use
- Institutional structures and rules for policymaking
- Organisational characteristics
- Policy level
- Population

| Study reference (alphabetical order)   | Organisational factors as listed in Table 2 in the article | Organisational factors as listed in Table 2 in the article |                |                              |                               |                              |                        |                         |                    |                      |                      |                      |                       |                                |                              |                            |             |                        |          |               |                  |                |       |                |             |                      |             |                       |
|----------------------------------------|------------------------------------------------------------|------------------------------------------------------------|----------------|------------------------------|-------------------------------|------------------------------|------------------------|-------------------------|--------------------|----------------------|----------------------|----------------------|-----------------------|--------------------------------|------------------------------|----------------------------|-------------|------------------------|----------|---------------|------------------|----------------|-------|----------------|-------------|----------------------|-------------|-----------------------|
|                                        |                                                            | External knowledge exchange                                | Gender and age | Individual values, interests | Position, status, and role in | Research awareness, research | Performance management | Strategic commitment to | Access to research | Inter-organisational | Intra-organisational | Knowledge management | Political environment | Implicit rules and preferences | Function of the organisation | Size and complexity of the | Policy area | Level of government or | Location | International | National/federal | State/regional | Local | Civil servants | Politicians | Service managers and | Researchers | Other external actors |
| Imani-Nasab et al. (2014)              | 9,11,24,25,45                                              |                                                            |                | ✓                            |                               |                              | ✓                      |                         |                    |                      |                      | ✓                    |                       |                                |                              |                            |             |                        |          | ✓             |                  |                | ✓     |                |             |                      |             |                       |
| Jbilou, Amara and Landry (2007)        | 3,4,9,15,18,20,29,55                                       | ✓                                                          | ✓              | ✓                            | ✓                             | ✓                            | ✓                      |                         |                    |                      |                      |                      |                       |                                | ✓                            |                            |             |                        |          | ✓             |                  | ✓              | ✓     |                |             |                      |             |                       |
| Kothari et al. (2009)                  | 21,25,29,30                                                |                                                            |                |                              | ✓                             | ✓                            | ✓                      |                         |                    |                      |                      |                      |                       |                                |                              |                            |             |                        |          | ✓             |                  | ✓              | ✓     |                |             |                      | ✓           |                       |
| Landry, Lamari and Amara (2003)        | 9,18,50,55,61,63                                           |                                                            |                | ✓                            | ✓                             |                              |                        |                         |                    |                      |                      |                      | ✓                     |                                | ✓                            | ✓                          | ✓           |                        |          | ✓             | ✓                |                | ✓     |                |             |                      |             |                       |
| Larsen, Gulis and Pedersen (2012)      | 19,20,30                                                   |                                                            |                |                              | ✓                             |                              |                        |                         |                    |                      |                      |                      |                       |                                |                              |                            |             |                        |          |               |                  | ✓              | ✓     |                |             |                      |             |                       |
| Laws et al. (2013)                     | 8,12,30,36,37,45,50                                        |                                                            |                | ✓                            | ✓                             |                              | ✓                      |                         | ✓                  |                      |                      | ✓                    | ✓                     |                                |                              |                            |             |                        |          |               | ✓                |                | ✓     |                |             | ✓                    |             |                       |
| Liverani, Hawkins and Parkhurst (2013) | 8,13,16                                                    |                                                            |                | ✓                            | ✓                             | ✓                            |                        |                         |                    |                      |                      |                      |                       |                                |                              |                            |             |                        | ✓        | ✓             | ✓                | ✓              | ✓     | ✓              |             |                      | ✓           |                       |
| Lomas and Brown (2009)                 | 22,24,25,27,30,31,34,45,50                                 |                                                            |                |                              |                               |                              | ✓                      | ✓                       | ✓                  |                      |                      | ✓                    | ✓                     |                                |                              |                            |             |                        |          |               | ✓                |                | ✓     |                |             |                      |             |                       |

- Individual factors
- Management of research integration
- Organisational systems and infrastructure for research use
- Institutional structures and rules for policymaking
- Organisational characteristics
- Policy level
- Population

| Study reference (alphabetical order) | Organisational factors as listed in Table 2 in the article | External knowledge exchange | Gender and age | Individual values, interests | Position, status, and role in | Research awareness, research | Performance management | Strategic commitment to | Access to research | Inter-organisational | Intra-organisational | Knowledge management | Political environment | Implicit rules and preferences | Function of the organisation | Size and complexity of the | Policy area | Level of government or | Location | International | National/federal | State/regional | Local | Civil servants | Politicians | Service managers and | Researchers | Other external actors |
|--------------------------------------|------------------------------------------------------------|-----------------------------|----------------|------------------------------|-------------------------------|------------------------------|------------------------|-------------------------|--------------------|----------------------|----------------------|----------------------|-----------------------|--------------------------------|------------------------------|----------------------------|-------------|------------------------|----------|---------------|------------------|----------------|-------|----------------|-------------|----------------------|-------------|-----------------------|
| Makkar et al. (2016)                 | 2,21,22,24,25,26,31,32,33,34,36,37,41,44,45,47             | √                           |                |                              |                               | √                            | √                      |                         | √                  | √                    |                      | √                    | √                     |                                |                              |                            |             |                        |          |               | √                |                |       | √              |             |                      |             | √                     |
| Mitton et al. (2007)                 | 9,12,13,15,25,27,28,29,50                                  |                             |                | √                            | √                             |                              | √                      | √                       |                    |                      |                      |                      |                       | √                              |                              |                            |             |                        |          |               | √                |                | √     | √              |             |                      | √           |                       |
| Moore et al. (2011)                  | 9,16,17,20,21,22,25,28,29,31,34,50                         |                             |                | √                            |                               | √                            | √                      | √                       | √                  |                      |                      |                      |                       | √                              |                              |                            |             |                        |          |               | √                | √              | √     | √              |             | √                    |             | √                     |
| Morgan (2010)                        | 40                                                         |                             |                |                              |                               |                              |                        |                         |                    |                      | √                    |                      |                       |                                |                              |                            |             |                        |          |               | √                | √              | √     | √              |             | √                    | √           | √                     |
| Mwendera et al. (2016)               | 22,27,34,36,37                                             |                             |                |                              |                               |                              | √                      | √                       | √                  | √                    |                      |                      |                       |                                |                              |                            |             |                        |          |               | √                |                | √     |                |             | √                    |             | √                     |
| Nabyonga-Orem et al. (2014)          | 25,29,36,39,42,44,45,46,60                                 |                             |                |                              |                               |                              | √                      | √                       |                    | √                    | √                    | √                    | √                     |                                |                              |                            | √           |                        |          |               | √                |                | √     | √              |             | √                    | √           | √                     |
| Newman (2014)                        | 4,15,18,20,61                                              |                             | √              |                              | √                             | √                            |                        |                         |                    |                      |                      |                      |                       |                                |                              |                            | √           |                        |          |               |                  | √              | √     |                |             |                      |             |                       |
| Nutley, Walter and Bland (2002)      | 12,16,34,39,40,49                                          |                             |                |                              | √                             | √                            |                        |                         | √                  |                      | √                    |                      |                       | √                              |                              |                            |             |                        |          |               | √                |                | √     |                | √           | √                    | √           | √                     |
| Oh (1996)                            | 15,18,26                                                   |                             |                |                              | √                             | √                            | √                      |                         |                    |                      |                      |                      |                       |                                |                              |                            |             |                        |          |               | √                | √              | √     | √              |             |                      |             | √                     |
| Oh and Rich (1996)                   | 9,15,34                                                    |                             |                | √                            | √                             |                              |                        |                         | √                  |                      |                      |                      |                       |                                |                              |                            |             |                        |          |               | √                | √              | √     | √              |             |                      |             | √                     |

|                                                            |
|------------------------------------------------------------|
| Individual factors                                         |
| Management of research integration                         |
| Organisational systems and infrastructure for research use |
| Institutional structures and rules for policymaking        |
| Organisational characteristics                             |
| Policy level                                               |
| Population                                                 |

| Study reference (alphabetical order)   | Organisational factors as listed in Table 2 in the article | External knowledge exchange | Gender and age | Individual values, interests | Position, status, and role in | Research awareness, research | Performance management | Strategic commitment to | Access to research | Inter-organisational | Intra-organisational | Knowledge management | Political environment | Implicit rules and preferences | Function of the organisation | Size and complexity of the | Policy area | Level of government or | Location | International | National/federal | State/regional | Local | Civil servants | Politicians | Service managers and | Researchers | Other external actors |
|----------------------------------------|------------------------------------------------------------|-----------------------------|----------------|------------------------------|-------------------------------|------------------------------|------------------------|-------------------------|--------------------|----------------------|----------------------|----------------------|-----------------------|--------------------------------|------------------------------|----------------------------|-------------|------------------------|----------|---------------|------------------|----------------|-------|----------------|-------------|----------------------|-------------|-----------------------|
| Oliver et al. (2014)                   | 2,5,7,8,9,11,20,22,23,29,30,31,32,33,34,36,45,47           | √                           | √              | √                            |                               | √                            | √                      | √                       | √                  | √                    |                      | √                    |                       |                                |                              |                            |             |                        |          |               | √                | √              | √     | √              |             | √                    | √           | √                     |
| Orton et al. (2011)                    | 25,28                                                      |                             |                |                              |                               |                              | √                      | √                       |                    |                      |                      |                      |                       |                                |                              |                            |             |                        |          | √             | √                | √              | √     |                |             | √                    |             |                       |
| Peirson et al. (2012)                  | 9,22,23,25,26,27,28,29,39,41,45,48                         |                             |                | √                            |                               |                              | √                      | √                       |                    |                      | √                    | √                    | √                     | √                              |                              |                            |             |                        |          |               |                  |                | √     | √              |             |                      |             |                       |
| Percy-Smith, Speller and Nutley (2006) | 27,36,39                                                   |                             |                |                              |                               |                              |                        | √                       |                    | √                    | √                    |                      |                       |                                |                              |                            |             |                        |          |               | √                |                | √     | √              |             |                      |             | √                     |
| Reul (2015)                            | 20,36,42,45,46,49,50                                       |                             |                |                              |                               |                              |                        |                         |                    |                      |                      | √                    | √                     | √                              |                              |                            |             |                        |          |               |                  | √              |       | √              |             |                      |             |                       |
| Tabak et al. (2016)                    | 16,20,21,23,25,26,27,29,30,38,49                           |                             |                |                              |                               | √                            | √                      | √                       |                    |                      |                      |                      |                       | √                              |                              |                            |             |                        |          |               |                  |                | √     | √              |             |                      |             |                       |
| Tricco et al. (2016)                   | 2,5,8,9,15,17,21,25,29,31,33,50                            | √                           | √              | √                            | √                             | √                            | √                      | √                       | √                  |                      |                      |                      |                       | √                              |                              |                            |             |                        |          |               | √                | √              | √     | √              |             | √                    |             |                       |
| Trostle, Bronfman and Langer (1999)    | 2,24,46                                                    | √                           |                |                              |                               |                              | √                      |                         |                    |                      |                      |                      | √                     |                                |                              |                            |             |                        |          |               | √                | √              | √     | √              |             |                      | √           | √                     |
| Twose et al. (2008)                    | 12,25,33                                                   |                             |                |                              | √                             |                              | √                      |                         | √                  |                      |                      |                      |                       |                                |                              |                            |             |                        |          |               |                  |                | √     | √              |             |                      |             |                       |
| van de Goor et al. (2017)              | 1,2,9,21,25,29,36,37                                       | √                           |                | √                            |                               | √                            | √                      | √                       |                    | √                    |                      |                      |                       |                                |                              |                            |             |                        |          |               | √                | √              | √     | √              |             |                      | √           | √                     |

- Individual factors
- Management of research integration
- Organisational systems and infrastructure for research use
- Institutional structures and rules for policymaking
- Organisational characteristics
- Policy level
- Population

| Study reference (alphabetical order) | Organisational factors as listed in Table 2 in the article | External knowledge exchange | Gender and age | Individual values, interests | Position, status, and role in | Research awareness, research | Performance management | Strategic commitment to | Access to research | Inter-organisational | Intra-organisational | Knowledge management | Political environment | Implicit rules and preferences | Function of the organisation | Size and complexity of the | Policy area | Level of government or | Location | International | National/federal | State/regional | Local | Civil servants | Politicians | Service managers and | Researchers | Other external actors |
|--------------------------------------|------------------------------------------------------------|-----------------------------|----------------|------------------------------|-------------------------------|------------------------------|------------------------|-------------------------|--------------------|----------------------|----------------------|----------------------|-----------------------|--------------------------------|------------------------------|----------------------------|-------------|------------------------|----------|---------------|------------------|----------------|-------|----------------|-------------|----------------------|-------------|-----------------------|
| van der Arend (2014)                 | 1,2,8,11,24,25,31,32,36,37,44,45,49                        | √                           |                | √                            |                               |                              | √                      |                         | √                  | √                    |                      |                      | √                     | √                              |                              |                            |             |                        |          |               | √                | √              |       | √              |             |                      |             |                       |
| von Lengerke et al. (2004)           | 57,58,59,62                                                |                             |                |                              |                               |                              |                        |                         |                    |                      |                      |                      |                       |                                |                              |                            | √           | √                      |          |               | √                | √              | √     | √              |             |                      |             | √                     |
| Walter, Nutley and Davies (2005)     | 10,12,13,25,27,28,29,30,50                                 |                             |                | √                            | √                             |                              | √                      | √                       |                    |                      |                      |                      |                       | √                              |                              |                            |             |                        |          |               | √                | √              | √     | √              |             | √                    | √           |                       |
| Williamson et al. (2015)             | 20,25,36,39,40,42,44                                       |                             |                |                              |                               | √                            | √                      |                         |                    | √                    | √                    | √                    | √                     |                                |                              |                            |             |                        |          |               | √                | √              | √     | √              |             | √                    | √           | √                     |
| Wye et al. (2015)                    | 12,22,26,45,49,52                                          |                             |                |                              | √                             |                              | √                      |                         |                    |                      |                      |                      | √                     | √                              | √                            |                            |             |                        |          |               |                  |                | √     | √              |             | √                    |             |                       |
| Yost et al. (2014)                   | 25,27,31,46                                                |                             |                |                              |                               |                              | √                      | √                       | √                  |                      |                      |                      | √                     |                                |                              |                            |             |                        |          |               |                  |                | √     | √              |             |                      |             |                       |
| Zardo and Collie (2014)              | 9,21,53                                                    |                             |                | √                            |                               | √                            |                        |                         |                    |                      |                      |                      |                       |                                | √                            |                            |             |                        |          |               | √                |                |       | √              |             |                      |             |                       |
| Zardo and Collie (2015)              | 6,15,18                                                    |                             | √              |                              | √                             | √                            |                        |                         |                    |                      |                      |                      |                       |                                |                              |                            |             |                        |          |               | √                |                |       | √              |             |                      |             |                       |
| Zardo, Collie and Livingstone (2015) | 12,13,27,30,31,33,42,48,49                                 |                             |                |                              | √                             |                              | √                      | √                       |                    |                      |                      | √                    |                       | √                              |                              |                            |             |                        |          |               |                  |                | √     | √              |             |                      |             |                       |

- Individual factors
- Management of research integration
- Organisational systems and infrastructure for research use
- Institutional structures and rules for policymaking
- Organisational characteristics
- Policy level
- Population
